# Supplementary material for: Soy isoflavone ameliorated the alterations in circulating adipokines and microRNAs of mice fed a high-fat diet
Source: Royal Society of Chemistry journal article supplement (doi:10.1039/d2fo02106d), 2022-01-01
Supplement: d2fo02106d1.pdf [file d2fo02106d1.pdf]

## Supplementary Data

**Table S1.** Composition of experimental diets

| Ingredients<br>(g/kg diet)                               | Diet   |        |        |        |
|----------------------------------------------------------|--------|--------|--------|--------|
|                                                          | CON    | HF     | HF/S   | HF/SI  |
| Casein <sup>1</sup>                                      | 195    | 195    |        |        |
| Soy protein isolate <sup>2</sup>                         |        |        | 195    | 195    |
| DL-Methionine                                            |        |        | 2.11   | 2.11   |
| Cystine                                                  | 3      | 3      | 1.59   | 1.59   |
| Sucrose                                                  | 120    | 340    | 340    | 340    |
| Cornstarch                                               | 429.24 | 56.996 | 56.296 | 54.796 |
| Maltodextrin                                             | 100    | 60     | 60     | 60     |
| Lard                                                     |        | 210    | 210    | 210    |
| Soybean oil                                              | 50     | 20     | 20     | 20     |
| Cholesterol                                              |        | 12.5   | 12.5   | 12.5   |
| Cellulose                                                | 50     | 37.5   | 37.5   | 37.5   |
| Mineral Mix                                              | 35     | 43     | 43     | 43     |
| Choline Bitartrate                                       | 2.75   | 3      | 3      | 3      |
| Vitamin Mix                                              | 15     | 19     | 19     | 19     |
| TBHQ, antioxidant                                        | 0.01   | 0.004  | 0.004  | 0.004  |
| Soy isoflavone concentrate <sup>3</sup>                  |        |        |        | 1.5    |
| Total                                                    | 1000   | 1000   | 1000   | 1000   |
| Total isoflavone as aglycone<br>equivalents (mg/kg diet) |        |        | 35     | 405    |
| Energy (kcal/g diet)                                     | 3.7    | 4.7    | 4.7    | 4.7    |

<sup>1</sup> Rennet Casein, edible grade (Dairygold, USA)

<sup>2</sup> Pro-fam 974 (0.037 mg genistein, 0.147 mg genistin, 0.014 mg daidzein, and 0.064 mg daidzin/g; a total of 0.18 mg isoflavone as aglycone equivalents/g; ADM, USA)

<sup>3</sup> Novasoy 400 (2.3 mg genistein, 219 mg genistin, 3.5 mg daidzein, and 170 mg daidzin/g; a total of 247 mg isoflavone as aglycone equivalents/g; ADM, USA)

CON, control diet; HF, high-fat diet; HF/S, high-fat/low-isoflavone soy protein isolate diet; HF/SI, high-fat/high-isoflavone soy protein isolate diet.

**Fig. S1**

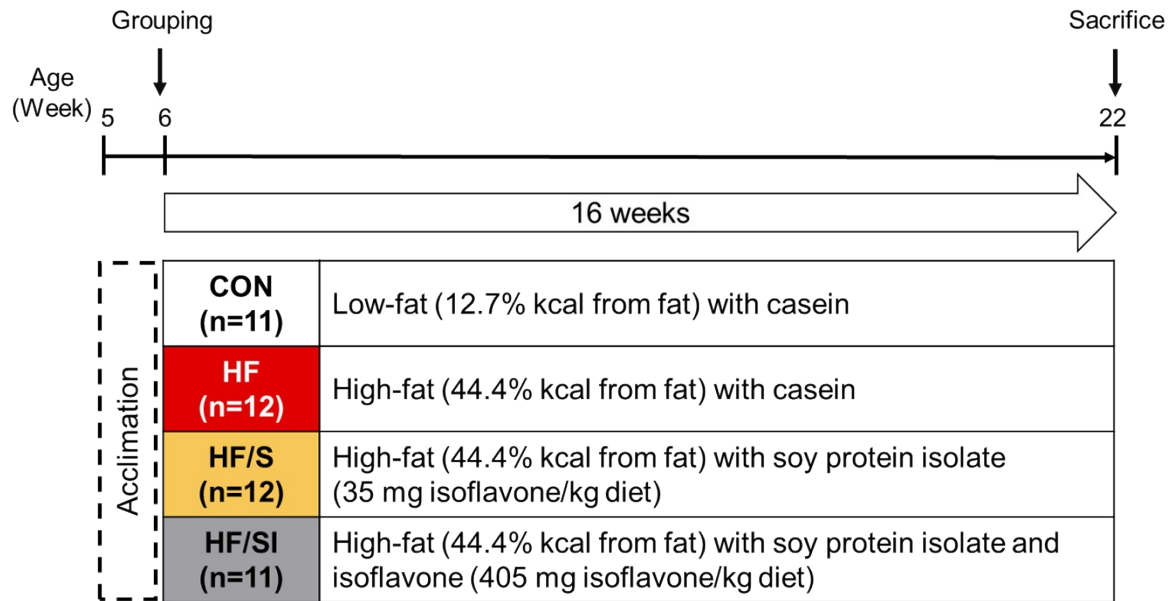

**Fig. S1.** Experimental scheme. CON, a group fed control diet; HF, a group fed high-fat diet; HF/S, a group fed high-fat/low-isoflavone soy protein diet; HF/SI, a group fed high-fat/high-isoflavone soy protein diet.

**Fig. S2**

**(A)**

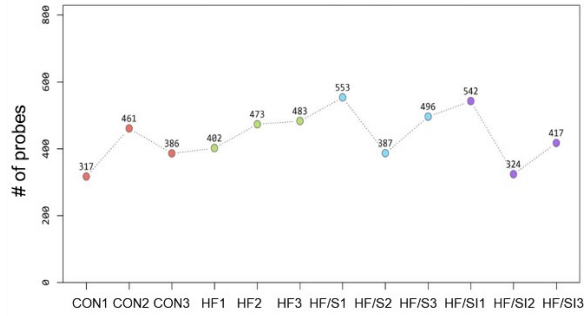

**(B)**

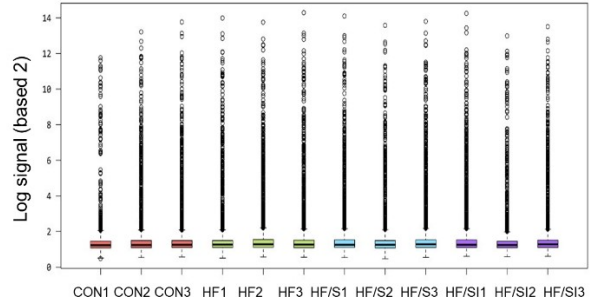

**(C)**

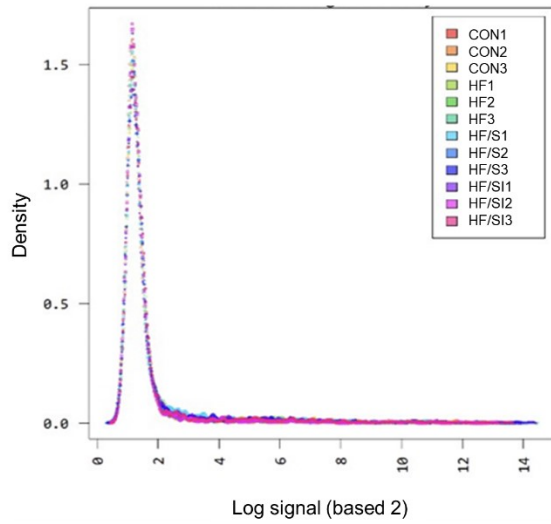

**Fig. S2.** Quality check of miRNA microarray expression data. (A) The number of detected miRNA probes in each sample. (B) Box plot and (C) density blot showing the normalized signal intensity distribution of each sample. CON, a group fed control diet; HF, a group fed high-fat diet; HF/S, a group fed high-fat/low-isoflavone soy protein diet; HF/SI, a group fed high-fat/high-isoflavone soy protein diet.
